# Supplementary material for: Role of Viscous Dissipative Processes on the Wetting of Textured Surfaces
Source: PubMed Central journal article supplement (PMC4585758; doi:10.1038/srep14159), 2015-09-22
Supplement: srep14159-s1.pdf [file srep14159-s1.pdf]

## SUPPLEMENTARY INFORMATION

### **Role of Viscous Dissipative Processes on the Wetting of Textured Surfaces**

H. S. Grewal, Hong Nam Kim, Il-Joo Cho, Eui-Sung Yoon \*

*Center for Biomicrosystems, Korea Institute of Science and Technology (KIST), Seoul, Republic  
of Korea*

\*Correspondence: E.-S. Yoon, Ph.D.  
e-mail: [esyoon@kist.re.kr](mailto:esyoon@kist.re.kr)  
Phone: +82-2-958-5651  
Fax: +82-2-958-6910

**Supplementary Table S1:** Physical properties of glycerol and water mixture used in wetting studies

| Glycerol (%) / Water (%) | Viscosity (mPa S) | Surface tension (mN/m) | Density (Kg/m <sup>3</sup> ) |
|--------------------------|-------------------|------------------------|------------------------------|
| 100/0                    | 1268.2            | 63.0                   | 1270.1                       |
| 95/5                     | 782.3             | 63.3                   | 1253.0                       |
| 90/10                    | 263.5             | 63.7                   | 1242.5                       |
| 85/15                    | 123.4             | 64.6                   | 1231.4                       |
| 75/25                    | 41.4              | 65.1                   | 1208.5                       |
| 50/50                    | 6.7               | 68.0                   | 1146.0                       |
| 0/100                    | 0.98              | 71.2                   | 998.0                        |

**Supplementary Table S2:** Value of the parameters used in Eq (8) for calculating the Hamaker constant

| Material | Dielectric constant, $\epsilon$ | Refractive index, $n$ | Absorption frequency, $\nu_e$ |
|----------|---------------------------------|-----------------------|-------------------------------|
| Water    | 80                              | 1.334                 | $3 \times 10^{15}$            |
| PTFE     | 2.1                             | 1.359                 | $2.9 \times 10^{15}$          |
| Si       | 11.68                           | 3.48                  | $3 \times 10^{15}$            |

**Supplementary Table S3:** Dimensions of the micro and nano cylindrical patterns used for wetting studies

| Case no. | Dimensions of micro-pillar     |  |                             |  |                              |     |     |     |      | Surface material |      |               |
|----------|--------------------------------|--|-----------------------------|--|------------------------------|-----|-----|-----|------|------------------|------|---------------|
|          | Diameter $D$ ( $\mu\text{m}$ ) |  | Pitch $P$ ( $\mu\text{m}$ ) |  | Height $H$ ( $\mu\text{m}$ ) |     |     |     |      |                  |      |               |
| I        | 3                              |  | 6                           |  | 0.2                          | 0.5 | 1   | 3   | 10   | 20               | 25   | PTFE          |
|          | Diameter $D$ (nm)              |  | Height $H$ (nm)             |  | Pitch $P$ (nm)               |     |     |     |      |                  |      |               |
| II       | 250                            |  | 220                         |  | 500                          | 600 | 750 | 900 | 1200 | 1500             | 1800 | Z-Dol and DLC |
